# Supplementary material
Source: PubMed Central journal article supplement (PMC3539044)
Supplement: supp_blood-2011-02-337725_Document1.pdf [file supp_blood-2011-02-337725_Document1.pdf]

## A. Effect on LFS

## B. Effect on OS

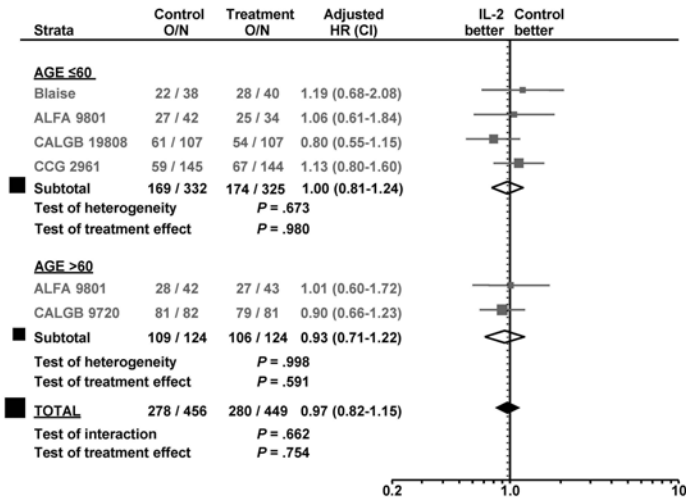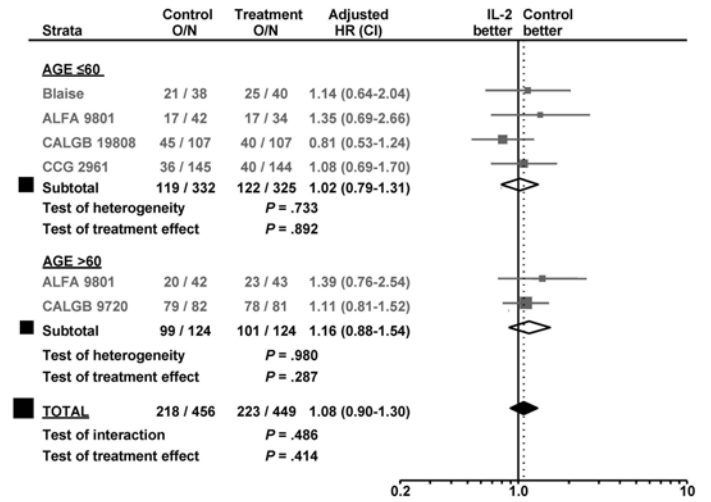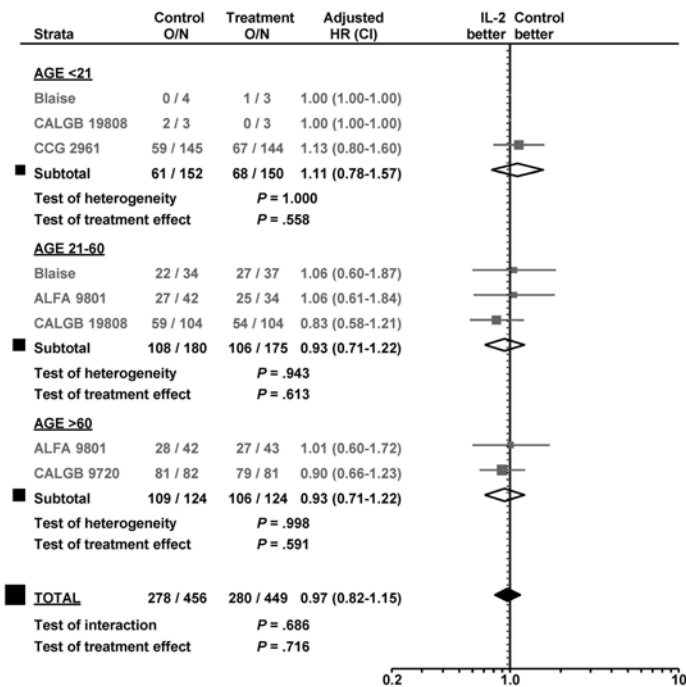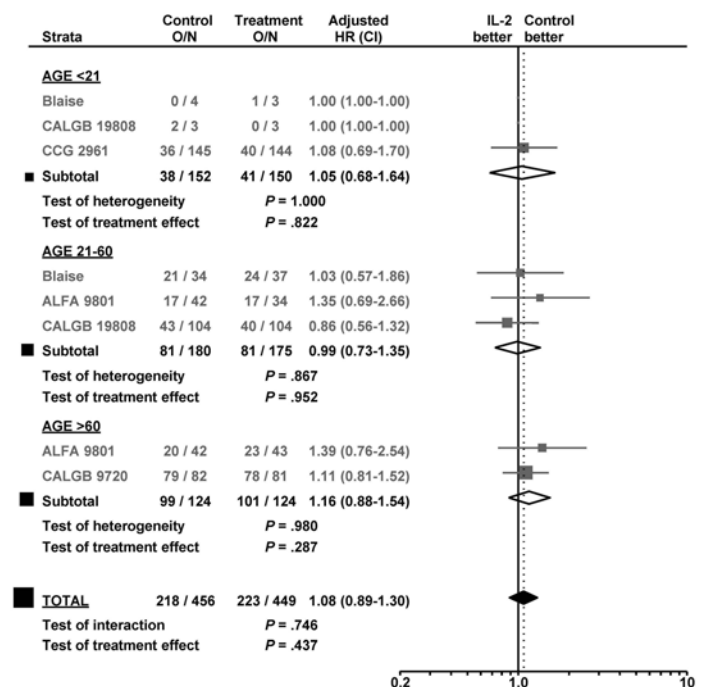

**Figure S1. Forest plots of HRs for the benefit of IL-2 monotherapy in terms of LFS (A) and OS (B) by age category (<21 vs 21-60 vs >60 years)**

CI = confidence interval; HR = hazard ratio; IL-2 = interleukin-2; LFS = leukemia-free survival; O/N = event rate per arm where O is the number of observed events (relapse or death) and N is the sample size; OS = overall survival; RCTs = randomized controlled trials.

## A. Effect on LFS

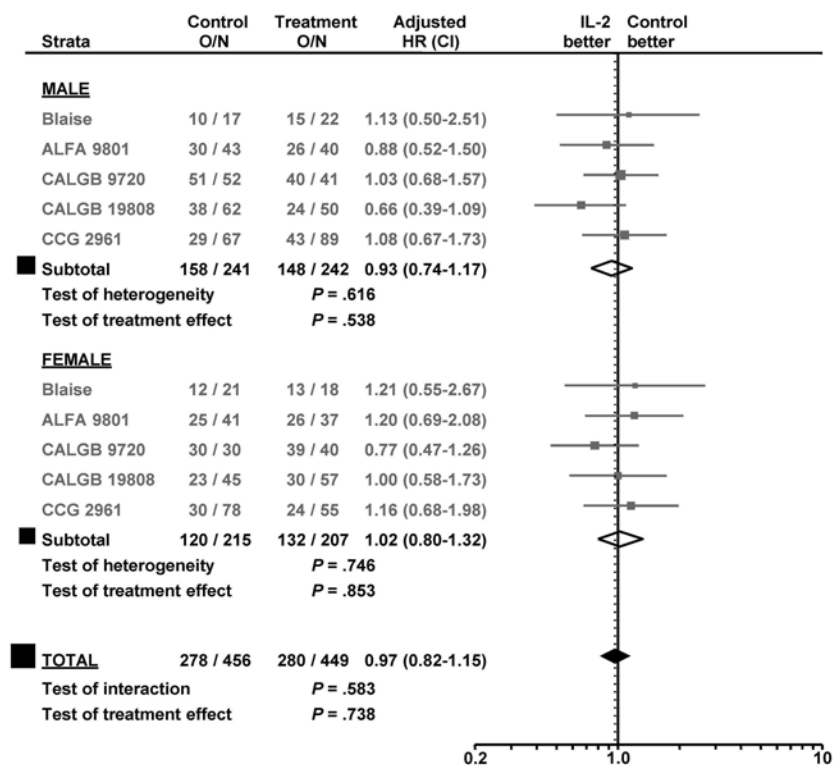

## B. Effect on OS

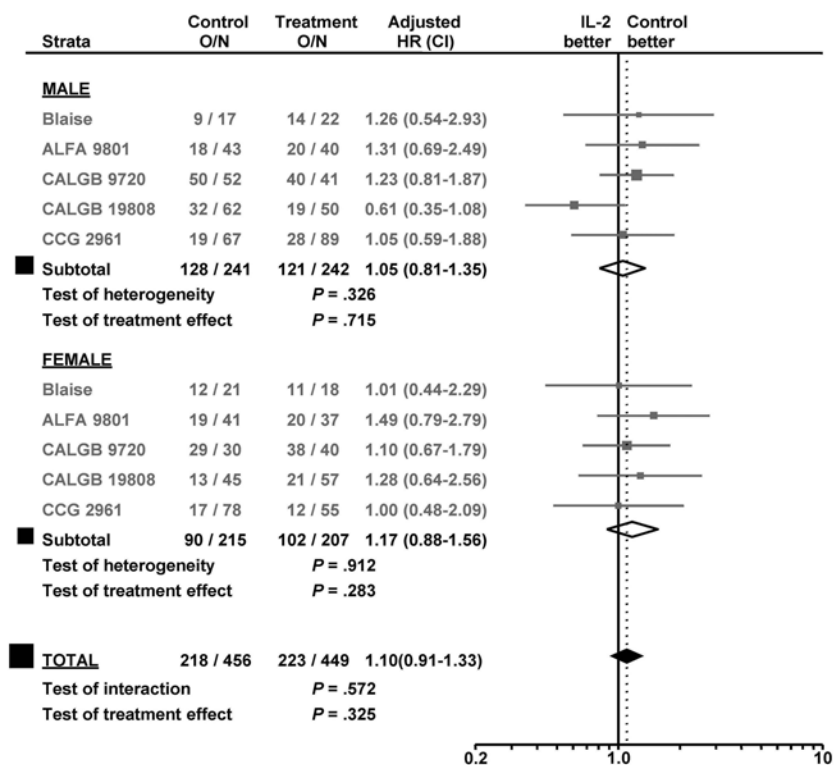

**Figure S2. Forest plots of HRs for the benefit of IL-2 monotherapy in terms of LFS (A) and OS (B) by gender (male vs female)**  
 CI = confidence interval; HR = hazard ratio; IL-2 = interleukin-2; LFS = leukemia-free survival; O/N = event rate per arm where O is the number of observed events (relapse or death) and N is the sample size; OS = overall survival; RCTs = randomized controlled trials.

### A. Effect on LFS

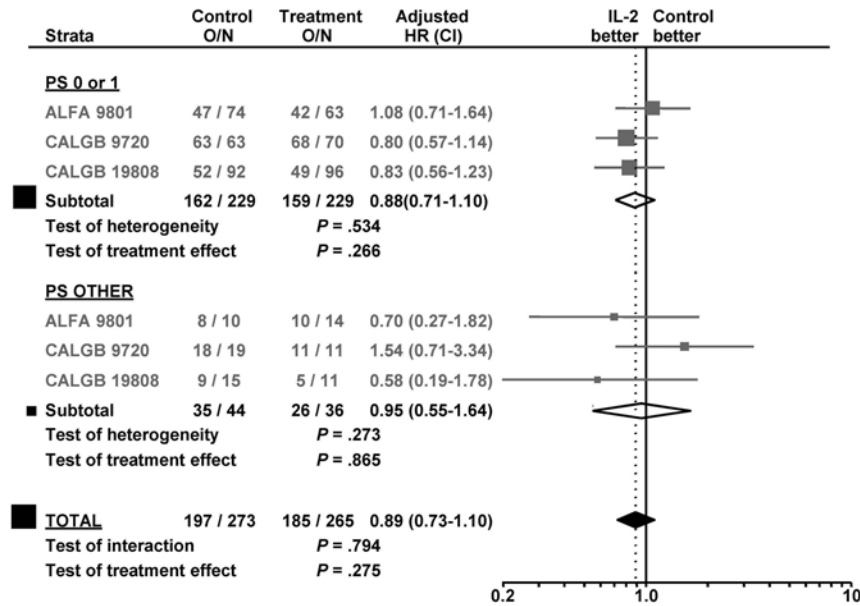

### B. Effect on OS

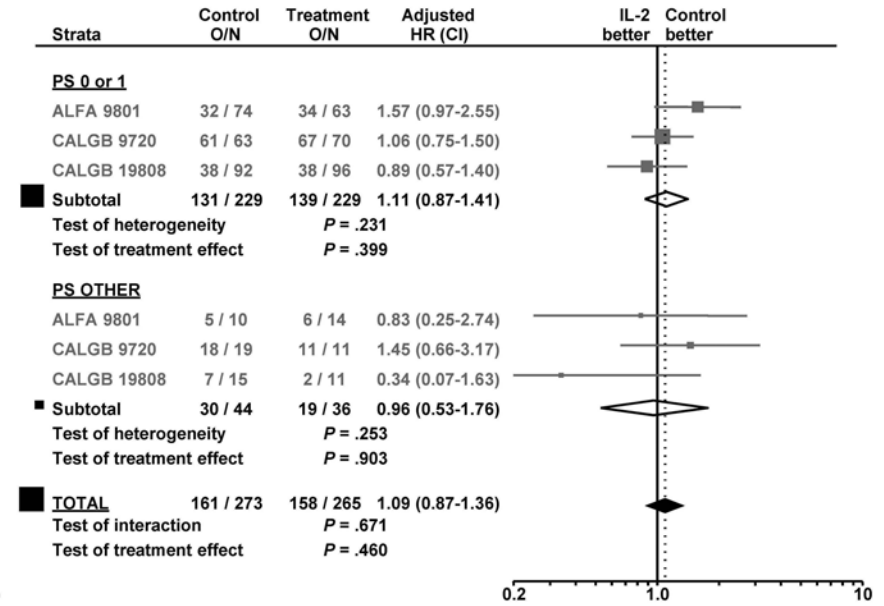

**Figure S3. Forest plots of HRs for the benefit of IL-2 monotherapy in terms of LFS (A) and OS (B) by baseline performance status (PS 0-1 vs other)**

CI = confidence interval; HR = hazard ratio; IL-2 = interleukin-2; LFS = leukemia-free survival; O/N = event rate per arm where O is the number of observed events (relapse or death) and N is the sample size; OS = overall survival; RCTs = randomized controlled trials.

## A. Effect on LFS

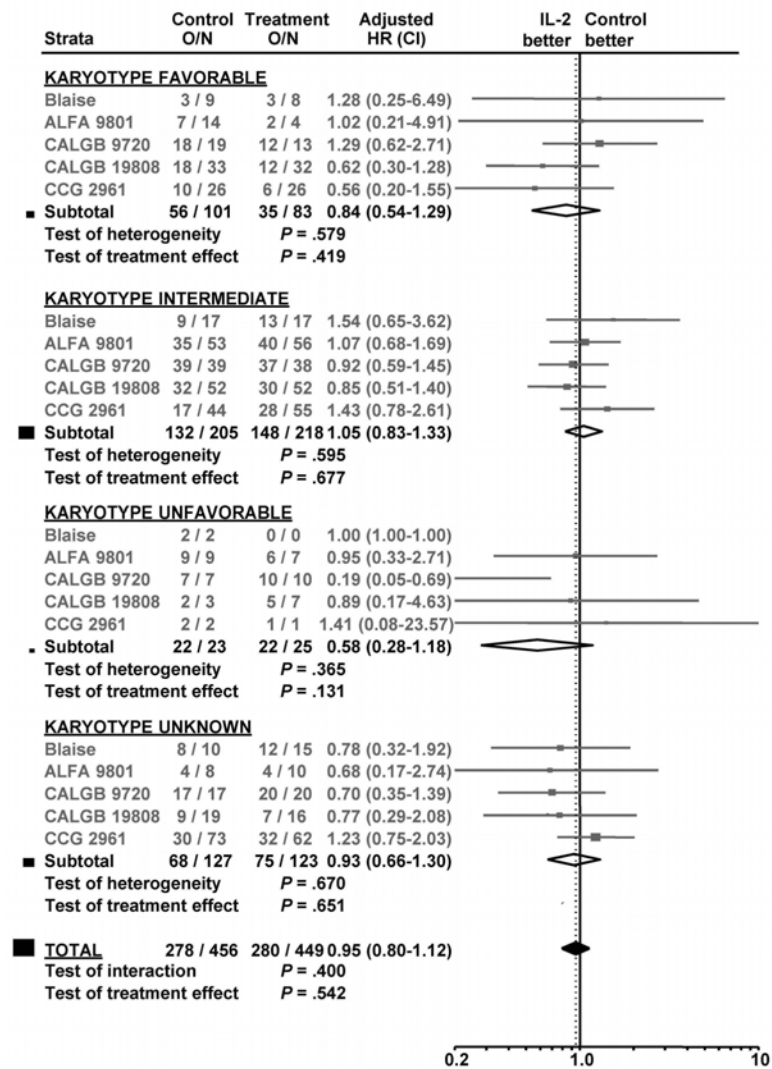

## B. Effect on OS

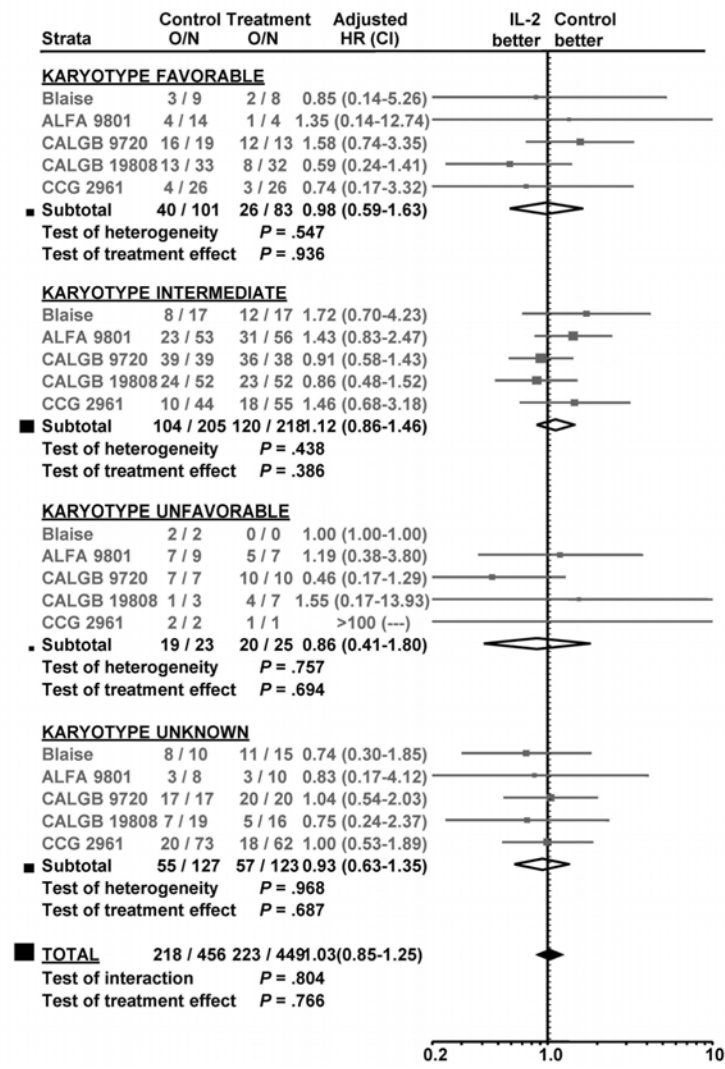

**Figure S4. Forest plots of HRs for the benefit of IL-2 monotherapy in terms of LFS (A) and OS (B) by four karyotype categories (favorable vs intermediate vs unfavorable vs unknown)**

CI = confidence interval; HR = hazard ratio; IL-2 = interleukin-2; LFS = leukemia-free survival; O/N = event rate per arm where O is the number of observed events (relapse or death) and N is the sample size; OS = overall survival; RCTs = randomized controlled trials.

### A. Effect on LFS

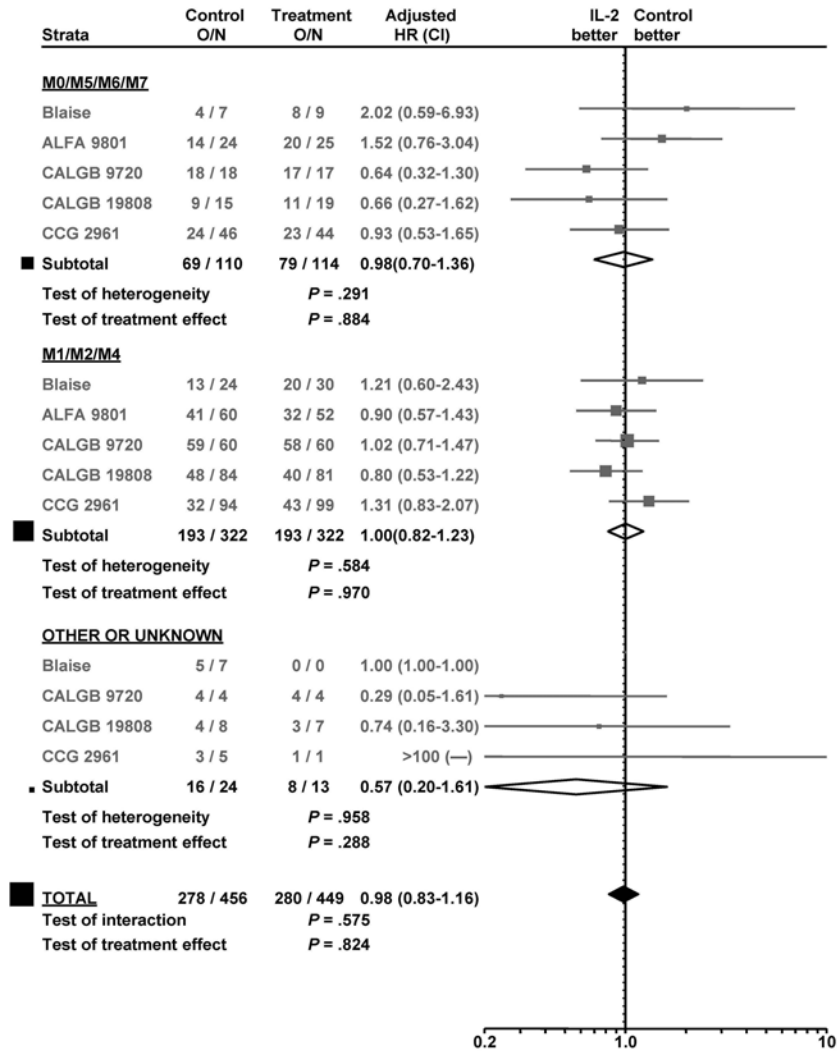

### B. Effect on OS

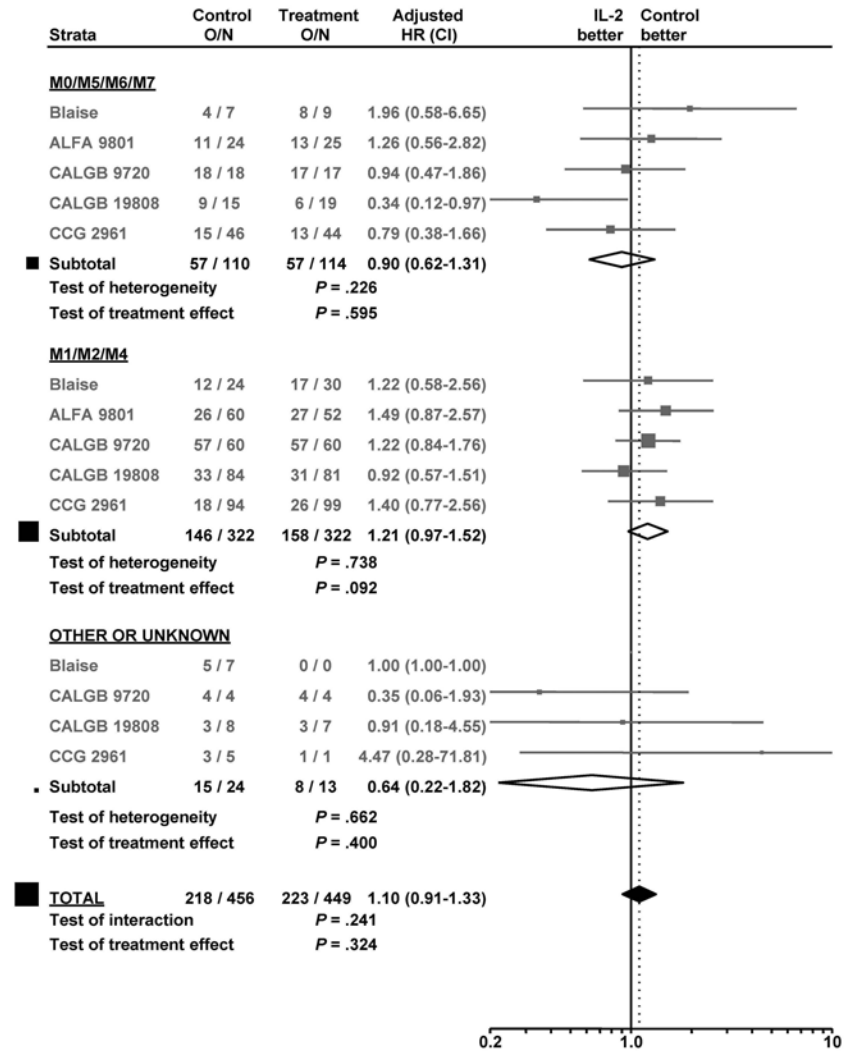

**Figure S5. Forest plots of HRs for the benefit of IL-2 monotherapy in terms of LFS (A) and OS (B) by three AML subtype categories (M0-M5-M6-M7 vs M1-M2-M4 vs other or unknown)**

AML = acute myeloid leukemia; CI = confidence interval; HR = hazard ratio; IL-2 = interleukin-2; LFS = leukemia-free survival; O/N = event rate per arm where O is the number of observed events (relapse or death) and N is the sample size; OS = overall survival; RCTs = randomized controlled trials.

## A. Effect on LFS

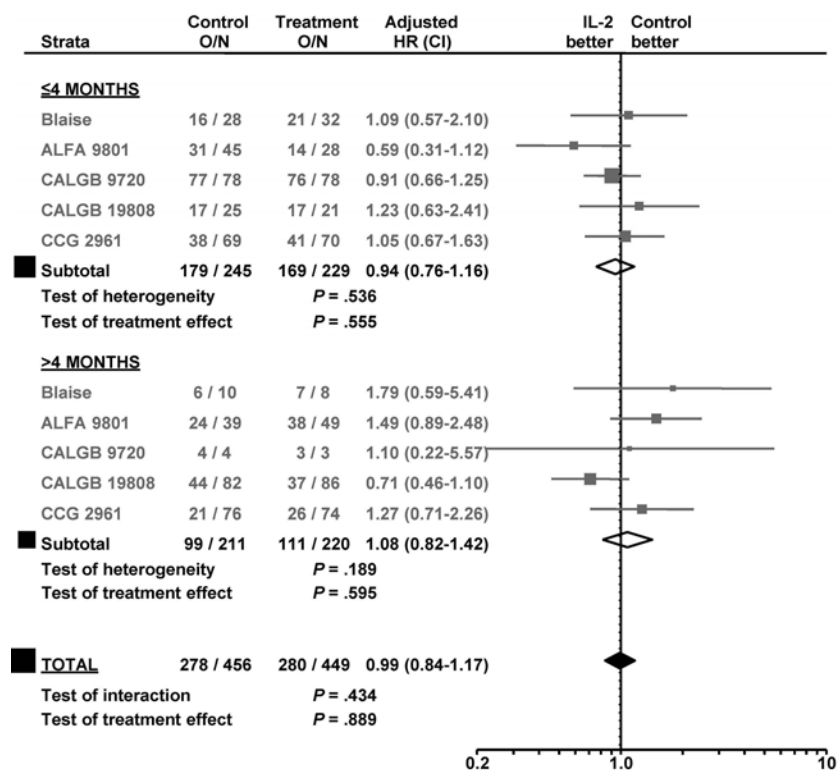

## B. Effect on OS

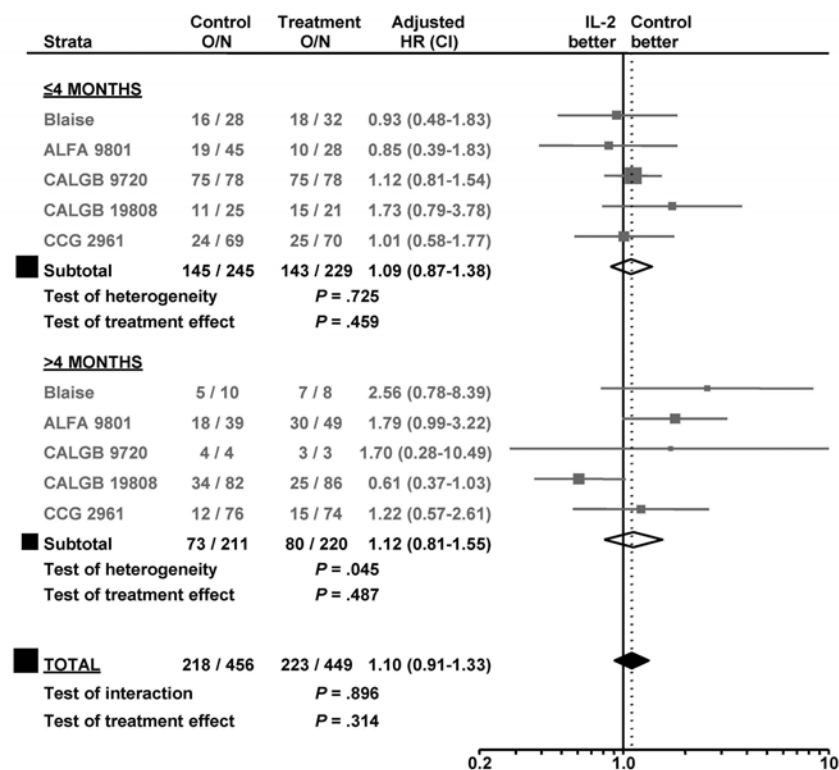

**Figure S6. Forest plots of HRs for the benefit of IL-2 monotherapy in terms of LFS (A) and OS (B) by time from CR (≤4 months vs >4 months)**

CI = confidence interval; CR = complete remission; HR = hazard ratio; IL-2 = interleukin-2;

LFS = leukemia-free survival; O/N = event rate per arm where O is the number of observed events (relapse or death) and N is the sample size; OS = overall survival; RCTs = randomized controlled trials.
